# Supplementary material
Source: publisher figshare collection journal article supplement (https://asha.figshare.com/articles/dataset/_/7728710)
Supplement: Supplementary file 1 [file 1]

## **Supplemental Material S1. Interview guide: weekly discussion topics.**

### **Introductions**

Please introduce yourself to the group by creating a comment telling the group about your work situation. How long have you been practicing as an SLP? Do you work on a specialized unit in your inpatient rehabilitation facility? If so, what unit? How many hours a week do you work in the inpatient setting? What region in the country do you work (e.g., Northeast). Tell the group a fun fact about yourself.

### **Week 1: Your Role in Current Service Delivery**

Describe to the group your role delivering augmentative and alternative communication (AAC) services. What are the strengths and limitations of this role in your workplace? How does your role affect your recommendations with supporting patient who have complex communication needs (i.e., individuals who have little to no functional speech due to acquired, developmental or degenerative neurological disabilities)?

### **Week 2: Team Service Delivery**

Tell the group about how you work with other team members in your facility when serving patients who have complex communication needs. What are the advantages and disadvantages of how your team operates?

### **Week 3: Success Stories of Supporting Individuals with Complex Communication Needs**

Describe to the group an example of effective patient-provider communication with an individual with complex communication needs in your workplace. Feel free to include a few examples, if you have time and would like to share.

### **Week 4: Challenges to Supporting Individuals with Complex Communication Needs**

Describe to the group an instance where there were challenges with patient-provider communication with an individual with complex communication needs in your workplace.

### **Week 5: Current Training Within the Inpatient Rehabilitation Setting**

How does your facility train speech-language pathologists and other staff members to interact with patients who have complex communication needs? What recommendations do you have for universities and rehabilitation facilities to better prepare speech-language pathologists and other health care professionals to interact with individuals with complex communication needs?

### **Week 6: Recommendations for Future Pre-service/In-service Trainings and Future Service Delivery**

Please provide a final post to discuss any remaining aspect pertaining to providing services to individuals with complex communication needs and their families in inpatient rehab that has not been previously discussed (or a previously discussed topic that you would like highlighted).
