# Supplementary material
Source: publisher figshare collection journal article supplement (https://asha.figshare.com/articles/dataset/_/7728710)
Supplement: Supplementary file 3 [file 1]

**Supplemental Material S3.** Summary of themes and the distribution of thought units across themes and participants.

| Theme                                                     | Representative Quote                                                        | Ariel | Charlotte | Corinne | Elaina | Jane | Lily | Peter | Rachel | Riley | Solana | Yen | <i>Total Thought Units per Theme</i> |
|-----------------------------------------------------------|-----------------------------------------------------------------------------|-------|-----------|---------|--------|------|------|-------|--------|-------|--------|-----|--------------------------------------|
| Complicated logistics of rehabilitation                   | "The medical model is very complicated and can be, at times, overwhelming"  | 6     | 13        | 6       | 6      | 5    | 7    | 7     | 11     | 3     | 10     | 13  | 87                                   |
| Centrality of the rehabilitation team                     | "Without a team approach implementing high- or low-tech AAC isn't possible" | 21    | 7         | 13      | 31     | 14   | 1    | 14    | 12     | 16    | 9      | 17  | 155                                  |
| Limited inpatient AAC resources, knowledge, and trainings | "We need resources and/or training, but not sure where to go from here"     | 23    | 8         | 25      | 18     | 19   | 8    | 24    | 18     | 30    | 12     | 34  | 219                                  |
| Influence of SLP attitudes on service delivery            | "Often times, the limitations are in us; not in our clients or patients"    | 0     | 0         | 2       | 2      | 0    | 0    | 1     | 0      | 0     | 6      | 6   | 17                                   |
|                                                           | Unrelated                                                                   | 1     | 1         | 0       | 1      | 1    | 0    | 1     | 3      | 1     | 0      | 4   | 13                                   |
|                                                           | <i>Total thought units per participant</i>                                  | 51    | 29        | 46      | 58     | 39   | 16   | 47    | 44     | 50    | 37     | 74  | 491                                  |
